# Supplementary material for: MicroRNA-410 Suppresses Migration and Invasion by Targeting MDM2 in Gastric Cancer
Source: PLOS journal article supplement (doi:10.1371/journal.pone.0104510), 2014-08-19
Supplement: S2 (10.1371/journal.pone.0104510.s002) [file journal.pone.0104510.s002]

Table S2 Primer sequence

| Name | Sequence (5’-3’) |
| --- | --- |
| miRNA reverse transcription prime |  |
| miRNA-410 | GTCGTATCCAGTGCAGGGTCCGAGGTAT TCGCACTGGATACGACTCAGCC |
| U6 snRNA | AAAATATGGAACGCTTCACGAATTTG |
| Real-time PCR primer sequence |  |
| miRNA-410 | GAGCAGCATTGTACAG |
|  | GTGCAGG GTCCGAGGT |
| U6 snRNA | CTCGCTTCGGCAGCACATATACT |
|  | ACGCTTCACGAATTTGCGTGTC |
| GAPDH | AATGGGCAGCCGTTAGGAAA |
|  | TGAAGGGGTCATTGATGGCA |
| MDM2 | GCATTCCTGTGA CTGAGCAG |
|  | TCAGGAAGCCAATTCTCACG |
